# Supplementary material for: Evaluation of red and near infrared fluorescent silver nanoclusters as potential in vivo indicators of tight junction opening
Source: Royal Society of Chemistry journal article supplement (doi:10.1039/c7ra05561g), 2017-01-01
Supplement: c7ra05561g1.pdf [file c7ra05561g1.pdf]

## Electronic Supplementary Information

### Evaluation of Red and Near Infrared Fluorescent Silver Nanoclusters as Potential *in vivo* Indicators of Tight Junction Opening

Xinyi Wang<sup>a1</sup>, Na Wang<sup>c1</sup>, Limei Li<sup>a</sup>, Ruyue Xiao<sup>b</sup>, Lan Yuan<sup>b</sup>, Xiaoda Yang<sup>✉b</sup>, Na Li<sup>d</sup>

<sup>a</sup> College of Sciences, Shenyang Agricultural University, Shenyang 110161, China.

<sup>b</sup> State Key laboratory of Natural and Biomimetic Drugs and Department of Chemical Biology, School of Pharmaceutical Sciences, Peking University, Beijing 100083, China. Fax: +86-10-62015584; Tel: +86-10-82801539; E-mail: xyang@bjmu.edu.cn

<sup>c</sup> Department of Pharmacognosy, School of Pharmaceutical Sciences, Hebei Medical University, Shijiazhuang 050017, China

<sup>d</sup> Beijing National Laboratory for Molecular Sciences (BNLMS), The Key Laboratory of Bioorganic Chemistry and Molecular Engineering, Ministry of Education, College of Chemistry and Molecular Engineering, Peking University, Beijing 100871, China

<sup>1</sup> Xinyi Wang and Na Wang contributed equally to this work.

✉ Corresponding author

## Characterization of Probes

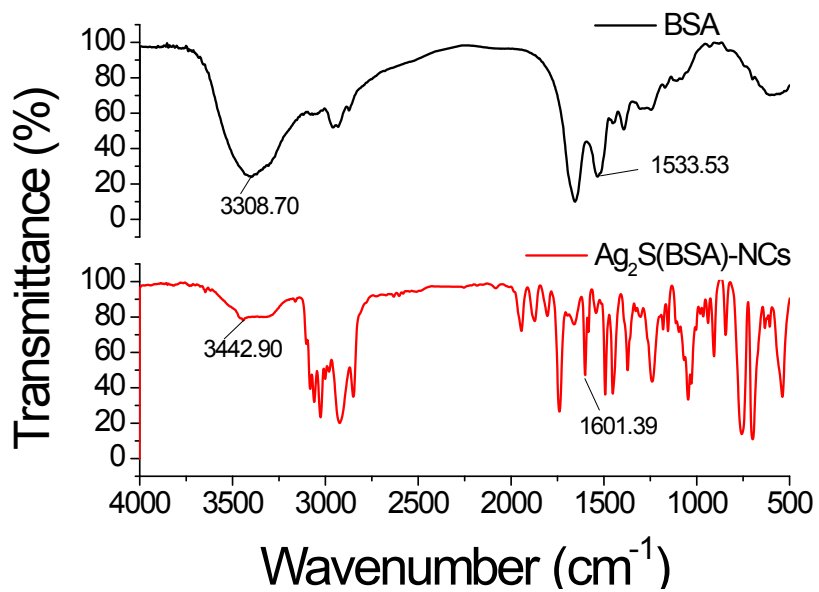

Fig. S1 FT-IR spectra of BSA and Ag<sub>2</sub>S(BSA)-NCs. The peaks of 3308.70 cm<sup>-1</sup> and 1533.53 cm<sup>-1</sup> belong to the C-N stretching vibration and N-H bending vibration of BSA, respectively. The characteristic peakred-shift of BSA in Ag<sub>2</sub>S(BSA)-NCs (increased by 134 cm<sup>-1</sup> and 68 cm<sup>-1</sup>) indicating the existence of interaction between the amino and Ag<sub>2</sub>S nanoclusters.

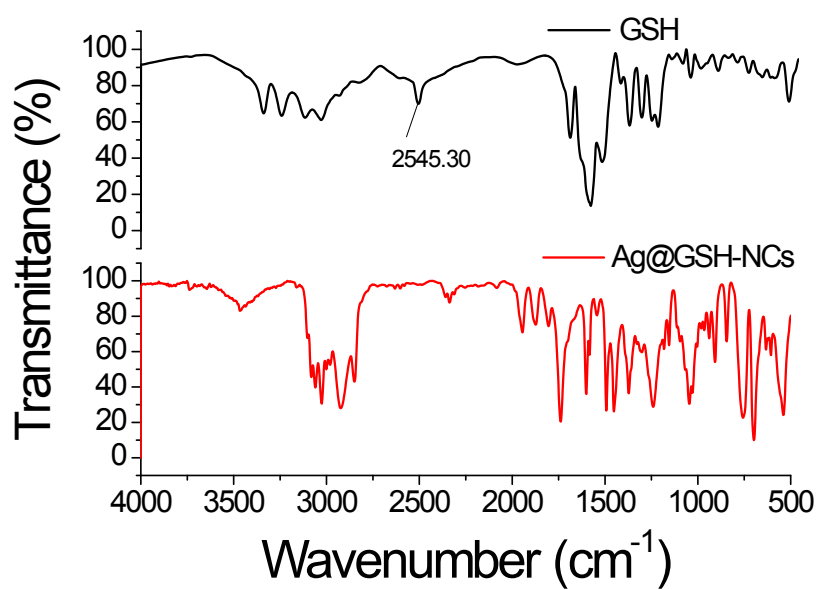

Fig.S2 FT-IR spectra of GSH and Ag(GSH)-NCs. The peaks of 2545.30  $\text{cm}^{-1}$  belong to the SH bond stretching vibration peak of GSH. The disappearance of SH characteristic peak in Ag(GSH)-NCs indicates the interaction between GSH and Ag nanoclusters.

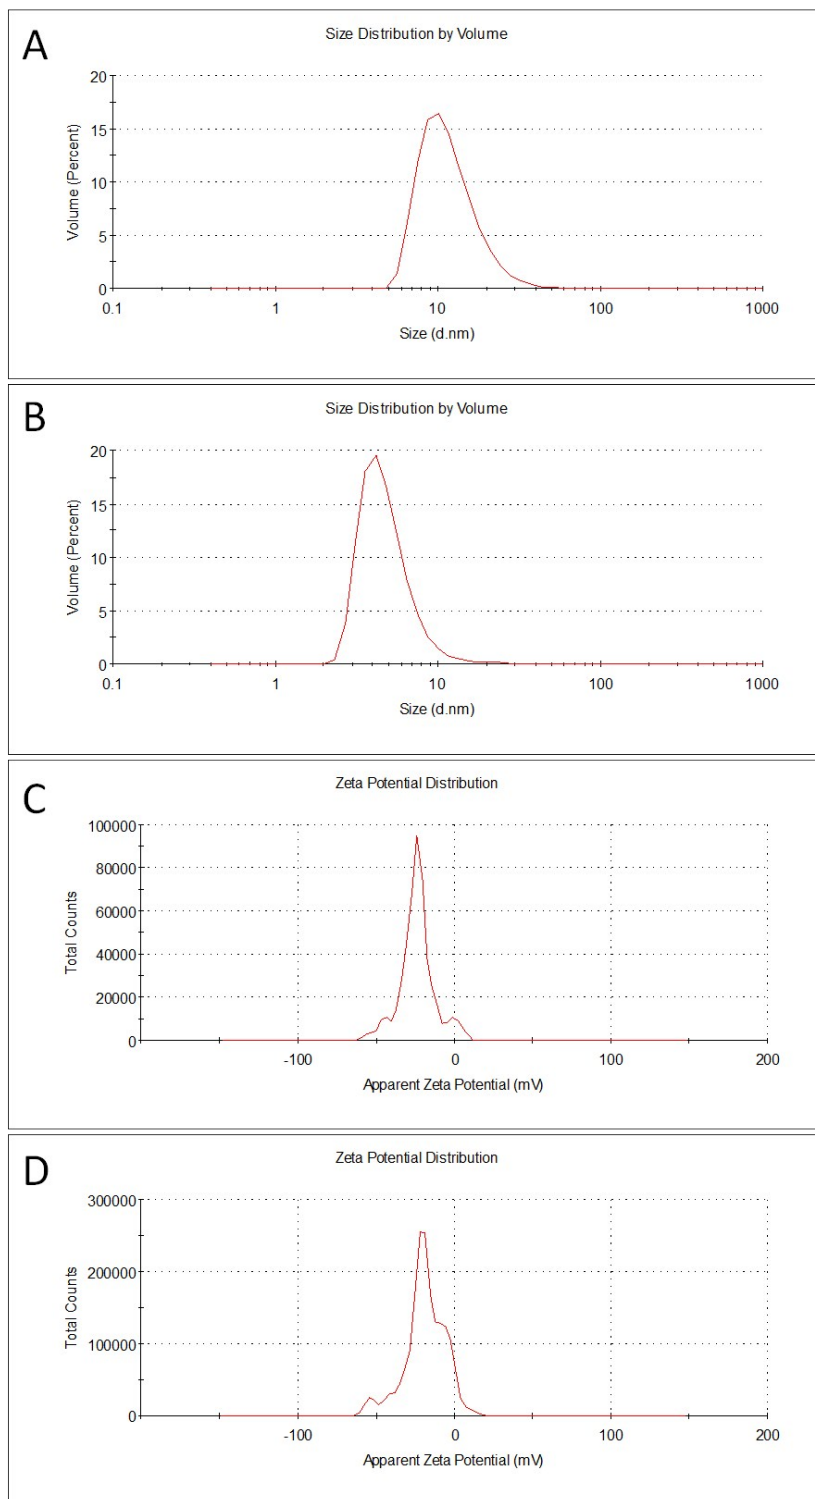

Fig. S3 Size and zeta potential distribution of AgNCs. (A) and (B) were the size distributions of Ag<sub>2</sub>S(BSA)-NCs and Ag(GSH)-NCs dispersed in NF-DMEM culture media respectively. (C) and (D) were zeta potential distribution of Ag<sub>2</sub>S(BSA)-NCs and Ag(GSH)-NCs dispersed in water respectively. Data were obtained by the dynamic light scattering (DLS) measurements.

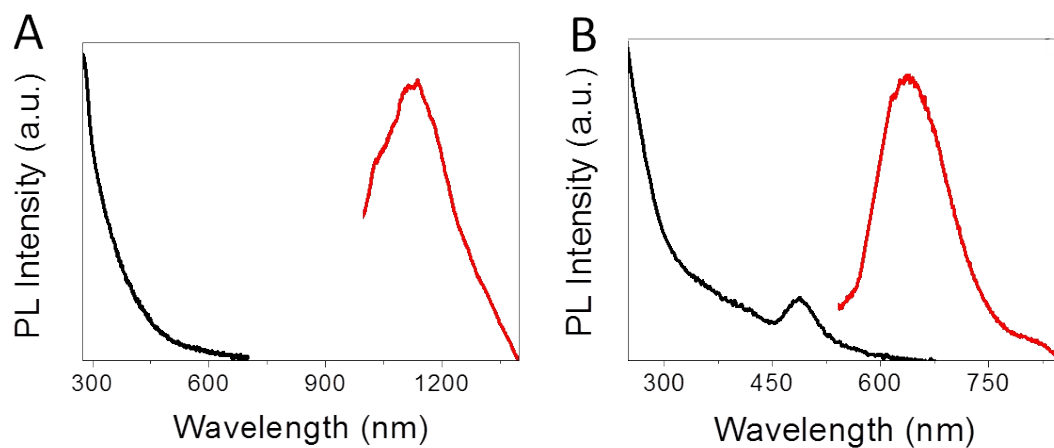

Fig. S4 The fluorescence excitation (black lines) and emission (red lines) spectra of (a)  $\text{Ag}_2\text{S}(\text{BSA})\text{-NCs}$  ( $\lambda_{\text{em}} = 1050$  nm for photoexcitation;  $\lambda_{\text{ex}} = 500$  nm for photoemission), (b)  $\text{Ag}(\text{GSH})\text{-NCs}$  ( $\lambda_{\text{em}} = 640$  nm for photoexcitation;  $\lambda_{\text{ex}} = 488$  nm for photoemission).

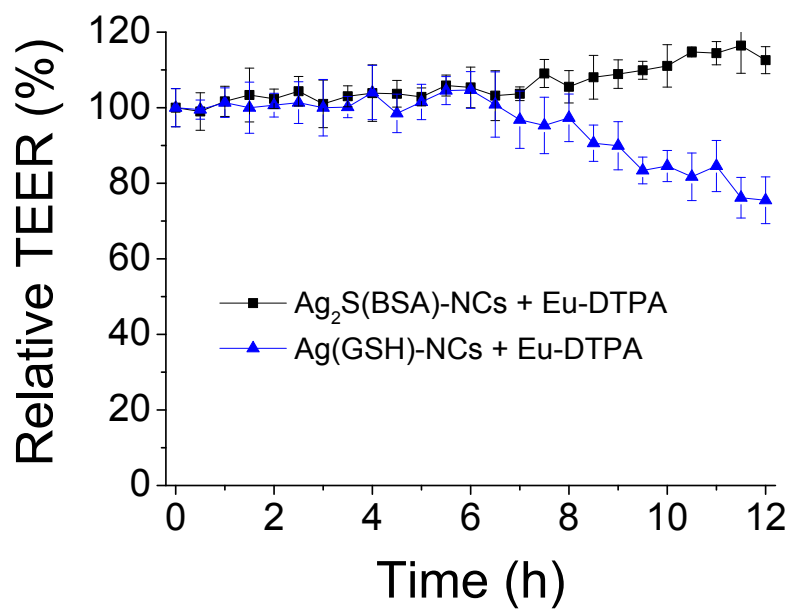

Fig. S5 TEER of MDCK cell monolayer after treated with AgNCs and Eu-DTPA combination. Ag<sub>2</sub>S(BSA)-NCs, 75 mg/L; Ag(GSH)-NCs, 8 mg/L; Eu-DTPA, 20 μmol/L. All data were the mean ± SD of four replicates.

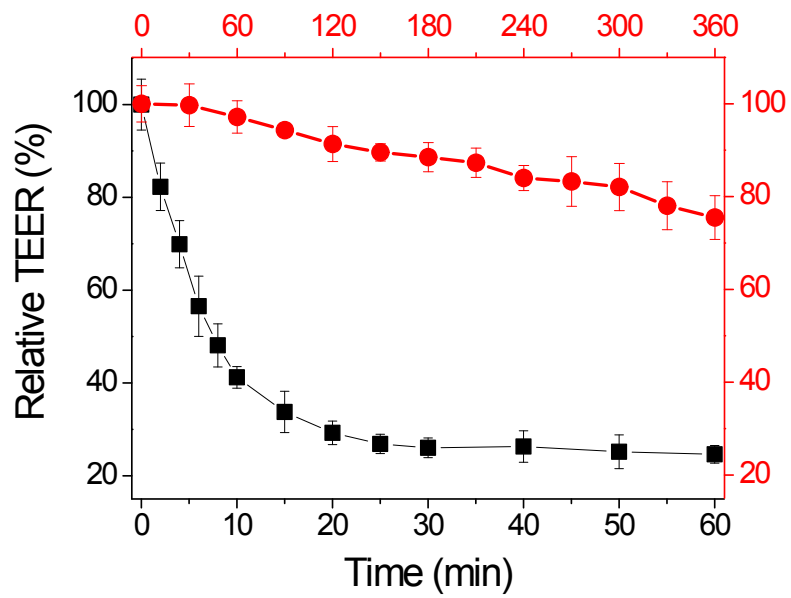

Fig. S6 TJ open treated by EDTA (0.5 mM, black) and VO(acac)<sub>2</sub> (80 μM, red).

### Size exclusion Chromatography of Eu-DTPA and AgNCs

Eu-DTPA (2  $\mu$ M) and Ag<sub>2</sub>S(BSA)-NCs(150 mg/L) were dissolved in NF-DMEM medium and applied to a Sephadex G25 column (0.5 mL, GE Health Care). The column was eluted with NF-DMEM medium and monitored per 100  $\mu$ L volume using a *Flexstation 3* microplate reader with a  $\lambda_{\text{ex/em}}$  of 340/616 nm and a measurement window from 600 to 1000 ms for Eu-DTPA, using Nanolog FL3-2iHR spectrometer with a  $\lambda_{\text{ex/em}}$  of 500/1050 nm for Ag<sub>2</sub>S(BSA)-NCs.

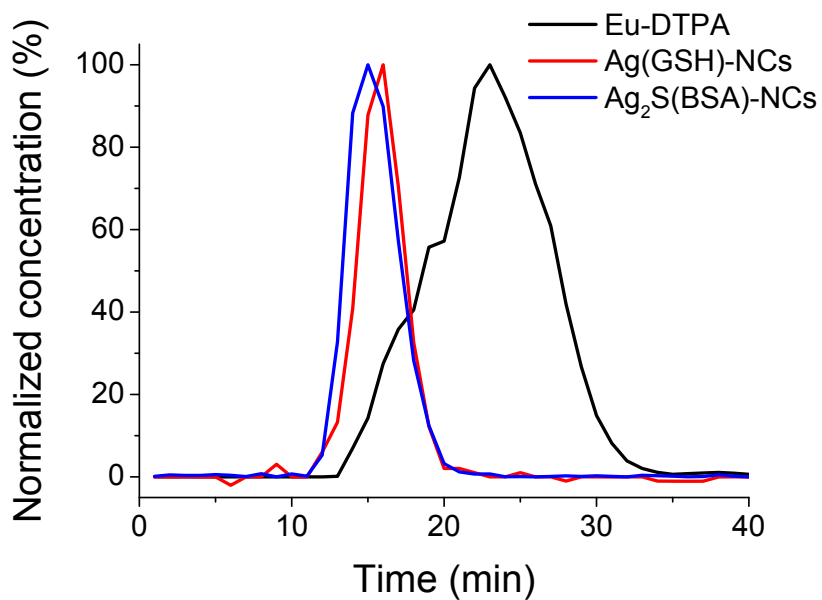

Fig. S7 Chromatograms of Eu-DTPA and AgNCs.
